# Supplementary material for: Treatment of beta amyloid 1–42 (Aβ1–42)-induced basal forebrain cholinergic damage by a non-classical estrogen signaling activator in vivo
Source: PubMed Central journal article supplement (PMC4754683; doi:10.1038/srep21101), 2016-02-16
Supplement: srep21101-s1.pdf [file srep21101-s1.pdf]

**Treatment of beta amyloid 1-42 ( $A\beta_{1-42}$ )-induced basal forebrain  
cholinergic damage by a non-classical estrogen signaling activator  
*in vivo***

Andrea Kwakowsky, Kyoko Potapov, SooHyun Kim, Katie Peppercorn,  
Warren P. Tate and István M. Ábrahám

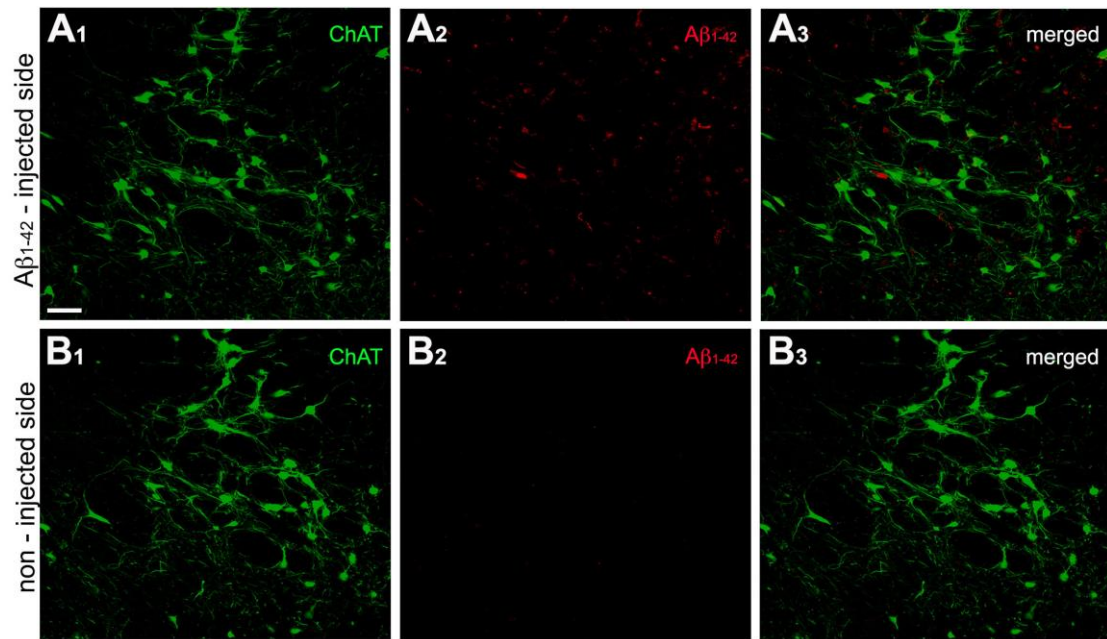

Photomicrographs demonstrate ChAT positive cell bodies in the NBM and Aβ<sub>1-42</sub> immunolabeling at the non-injected control brain side (A) and Aβ<sub>1-42</sub> injected side (B) after 90 min of Aβ<sub>1-42</sub> injection. Scale bar, 40 μm.
